# Supplementary material for: Interaction energy and isosteric heat of adsorption between hydrogen and magnesium diboride
Source: Royal Society of Chemistry journal article supplement (doi:10.1039/d2cp04730f), 2023-01-01
Supplement: d2cp04730f2.pdf [file d2cp04730f2.pdf]

## SUPPLEMENTARY DOCUMENT

### Interaction Energy and Isotheric Heat of Adsorption between Hydrogen and Magnesium Diboride

*Thi Kieu Ngan Pham, \*<sup>a</sup> Sichi Li, <sup>b</sup> and Joseph J. Brown <sup>a</sup>*

<sup>a</sup> Department of Mechanical Engineering, University of Hawai‘i at Mānoa, Hawai‘i, USA.

<sup>b</sup> Laboratory for Energy Applications for the Future (LEAF), Lawrence Livermore National Laboratory, Livermore, California 94550, USA

| <u>Section:</u>                                    | <u>Page:</u> |
|----------------------------------------------------|--------------|
| 1. Fourier Series Coefficients                     | S2           |
| 2. Interaction energies at different charge values | S4           |

## 1. Fourier series coefficients

**Table 1S:** The analytical expression of the Fourier series coefficients for 5 terminated planes of MgB<sub>2</sub>

| $n$                                            | $g_n^*/2\pi$  | $f_n(s_1, s_2)/2$                                                                                                                                    |
|------------------------------------------------|---------------|------------------------------------------------------------------------------------------------------------------------------------------------------|
| <b>B (0001) plane</b>                          |               |                                                                                                                                                      |
| 1                                              | $2/\sqrt{3}$  | $-[\cos 2\pi s_1 + \cos 2\pi s_2 + \cos (2\pi(s_1 + s_2))]$                                                                                          |
| 2                                              | 2             | $2[\cos(2\pi s_1 + s_2) + \cos (s_1 + 2\pi s_2) + \cos (2\pi(s_1 - s_2))]$                                                                           |
| 3                                              | $4/\sqrt{3}$  | $-[\cos(4\pi s_1) + \cos (4\pi s_2) + \cos (4\pi(s_1 + s_2))]$                                                                                       |
| 4                                              | $2\sqrt{7/3}$ | $-[\cos 2\pi(3s_1 + s_2) + \cos 2\pi(3s_2 + s_1) + \cos 2\pi(3s_1 + 2s_2) + \cos 2\pi(2s_1 + 3s_2) + \cos 2\pi(s_1 - 2s_2) + \cos 2\pi(2s_1 - s_2)]$ |
| 5                                              | $6/\sqrt{3}$  | $2[\cos 6\pi s_1 + \cos 6\pi s_2 + \cos (6\pi(s_1 + s_2))]$                                                                                          |
| <b>Mg (0001) plane</b>                         |               |                                                                                                                                                      |
| 1                                              | $2/\sqrt{3}$  | $\cos 2\pi s_1 + \cos 2\pi s_2 + \cos (2\pi(s_1 + s_2))$                                                                                             |
| 2                                              | 2             | $\cos 2\pi(2s_1 + s_2) + \cos 2\pi(s_1 + 2\pi s_2) + \cos (2\pi(s_1 - s_2))]$                                                                        |
| 3                                              | $4/\sqrt{3}$  | $\cos(4\pi s_1) + \cos (4\pi s_2) + \cos (4\pi(s_1 + s_2))$                                                                                          |
| 4                                              | $2\sqrt{7/3}$ | $\cos 2\pi(3s_1 + s_2) + \cos 2\pi(3s_2 + s_1) + \cos 2\pi(3s_1 + 2s_2) + \cos 2\pi(2s_1 + 3s_2) + \cos 2\pi(s_1 - 2s_2) + \cos 2\pi(2s_1 - s_2)$    |
| 5                                              | $6/\sqrt{3}$  | $\cos 6\pi s_1 + \cos 6\pi s_2 + \cos (6\pi(s_1 + s_2))$                                                                                             |
| <b>B (10<math>\bar{1}</math>0)</b>             |               |                                                                                                                                                      |
| 1                                              | 1.317         | $-2\cos (2\pi(s_1 + s_2)+\pi )$                                                                                                                      |
| 2                                              | 2             | $-2[\cos(4\pi s_1 + \pi) + \cos (4\pi s_2 + \pi)]$                                                                                                   |
| 3                                              | 2.635         | $2\cos 4\pi(s_1 + s_2)$                                                                                                                              |
| 4                                              | 3.034         | $2[\cos 2\pi(3s_1 + s_2) + \cos 2\pi(s_1 + 3\pi s_2)]$                                                                                               |
| 5                                              | 3.95          | $-2\cos (6\pi(s_1 + s_2)+3\pi )$                                                                                                                     |
| <b>Mg (10<math>\bar{1}</math>0)</b>            |               |                                                                                                                                                      |
| 1                                              | 1.317         | $-2\cos [-2\pi(s_1 + s_2)]$                                                                                                                          |
| 2                                              | 2             | $2[\cos(4\pi s_1) + \cos (4\pi s_2)]$                                                                                                                |
| 3                                              | 2.635         | $2\cos 4\pi(s_1 + s_2)$                                                                                                                              |
| 4                                              | 3.034         | $-2[\cos 2\pi(3s_1 + s_2) + \cos 2\pi(3s_2 + s_1)]$                                                                                                  |
| 5                                              | 3.95          | $-2\cos 6\pi(s_1 + s_2)$                                                                                                                             |
| <b>Mg-B (11<math>\bar{2}</math>0) – for Mg</b> |               |                                                                                                                                                      |
| 1                                              | 1.193         | $2\cos (2\pi(s_1 + s_2)+\pi )$                                                                                                                       |
| 2                                              | 2.16          | $-2[\cos(4\pi s_1 + \pi) + \cos (4\pi s_2 + \pi)]$                                                                                                   |
| 3                                              | 2.38          | $2\cos (4\pi(s_1 + s_2))$                                                                                                                            |
| 4                                              | 2.98          | $-2[\cos(2\pi(3s_1 + s_2) + 2\pi) + \cos 2\pi(s_1 + 3\pi s_2)]$                                                                                      |

|   |       |                                                        |
|---|-------|--------------------------------------------------------|
| 5 | 3.57  | $2\cos(6\pi(s_1 + s_2) + 3\pi)$                        |
|   |       |                                                        |
|   |       | <b>Mg-B (11<math>\bar{2}</math>0) – for B</b>          |
| 1 | 1.193 | $4\cos 2\pi(s_1 + s_2)$                                |
| 2 | 2.16  | $2[\cos(4\pi s_1) + \cos(4\pi s_2)]$                   |
| 3 | 2.38  | $4\cos 4\pi(s_1 + s_2)$                                |
| 4 | 2.98  | $2[\cos 2\pi(3s_1 + s_2) + \cos 2\pi(s_1 + 3\pi s_2)]$ |
| 5 | 3.57  | $4\cos 6\pi(s_1 + s_2)$                                |

## 2. Interaction energies at different charge values

*Table 2S: The interaction energy variation at different charge values of B and Mg atoms.*

| <b>B(0001)</b>                     |        | Interaction Energy ( $\text{kJ mol}^{-1}$ ) at varied charge values ( $q_B$ : Boron charge, $q_{Mg}$ : Magnesium charge) |         |         |        |  |
|------------------------------------|--------|--------------------------------------------------------------------------------------------------------------------------|---------|---------|--------|--|
| $q_B \backslash q_{Mg}$            | 1.45   | 1.55                                                                                                                     | 1.65    | 1.75    | 1.85   |  |
| -0.2                               | -33.11 | -40.62                                                                                                                   | -48.88  | -57.89  | -67.65 |  |
| -0.3                               | -18.73 | -22.95                                                                                                                   | -28.92  | -36.24  | -44.26 |  |
| -0.4                               | -12.18 | -15.14                                                                                                                   | -18.58  | -22.53  | -27    |  |
| -0.5                               | -5.49  | -9.8                                                                                                                     | -12.38  | -15.3   | -18.62 |  |
| -0.6                               | -22.6  | -14.41                                                                                                                   | -4.94   | -6.91   | -12.77 |  |
|                                    |        |                                                                                                                          |         |         |        |  |
| <b>Mg(0001)</b>                    |        | Interaction Energy at varied charge values                                                                               |         |         |        |  |
| $q_B \backslash q_{Mg}$            | 0.68   | 0.78                                                                                                                     | 0.88    | 0.98    | 1.08   |  |
| -0.64                              | -2.39  | -1.36                                                                                                                    | -0.776  | -0.1315 |        |  |
| -0.74                              | -5.28  | -3.14                                                                                                                    | -1.92   | -1.15   |        |  |
| -0.84                              | -9.6   | -6.38                                                                                                                    | -4.0495 | -2.56   | -1.71  |  |
| -0.94                              | -13.91 | -10.8                                                                                                                    | -7.27   | -4.91   | -3.35  |  |
| -1.04                              | -19.25 | -15.91                                                                                                                   | -12.08  | -8.59   | -5.87  |  |
|                                    |        |                                                                                                                          |         |         |        |  |
| <b>B(101<math>\bar{0}</math>)</b>  |        | Interaction Energy at varied charge values                                                                               |         |         |        |  |
| $q_B \backslash q_{Mg}$            | 0.83   | 0.93                                                                                                                     | 1.03    | 1.13    | 1.23   |  |
| -0.24                              | -14.35 | -18.2                                                                                                                    | -22.65  | -27.71  | -33.33 |  |
| -0.34                              | -13.16 | -16.75                                                                                                                   | -20.87  | -25.59  | -30.85 |  |
| -0.44                              | -11.23 | -15.19                                                                                                                   | -19.36  | -23.96  | -28.97 |  |
| -0.54                              | -7.89  | -12.08                                                                                                                   | -16.72  | -21.73  | -27.02 |  |
| -0.64                              | -3.81  | -7.99                                                                                                                    | -12.65  | -17.87  | -23.57 |  |
|                                    |        |                                                                                                                          |         |         |        |  |
| <b>Mg(101<math>\bar{0}</math>)</b> |        | Interaction Energy at varied charge values                                                                               |         |         |        |  |
| $q_B \backslash q_{Mg}$            | 1.22   | 1.32                                                                                                                     | 1.42    | 1.52    | 1.62   |  |
| -1.17                              | -11.52 | -10.69                                                                                                                   | -8.5    | -5.7    | -2.95  |  |
| -1.27                              | -11.53 | -13.22                                                                                                                   | -12.47  | -10.29  | -7.42  |  |
| -1.37                              | -8.61  | -13.28                                                                                                                   | -15.07  | -14.39  | -12.23 |  |
| -1.47                              | -4.13  | -10.36                                                                                                                   | -15.17  | -17.05  | -16.46 |  |
| -1.57                              |        | -5.69                                                                                                                    | -12.26  | -17.19  | -19.17 |  |

| <b>(1120)</b>           | Interaction Energy at varied charge values |        |        |        |        |
|-------------------------|--------------------------------------------|--------|--------|--------|--------|
| $q_B \backslash q_{Mg}$ | 1.32                                       | 1.42   | 1.52   | 1.62   | 1.72   |
| -0.69                   | -17.68                                     | -20.64 | -22.99 | -25.25 | -26.9  |
| -0.79                   | -15.44                                     | -19.77 | -23.74 | -27.31 | -30.68 |
| -0.89                   | -10.51                                     | -15.99 | -21.27 | -26.26 | -30.99 |
| -0.99                   | -3.5                                       | -9.72  | -16    | -22.18 | -28.19 |
| -1.09                   |                                            | -1.65  | -8.44  | -15.48 | -22.51 |
